# Supplementary material for: Rosuvastatin improves endothelial function in patients with inflammatory joint diseases, longitudinal associations with atherosclerosis and arteriosclerosis: results from the RORA-AS statin intervention study
Source: PubMed Central journal article supplement (PMC4597440; doi:10.1186/s13075-015-0795-y), 2015-10-08
Supplement: 13075_2015_795_MOESM1_ESM.pdf [file 13075_2015_795_MOESM1_ESM.pdf]

**Additional file 1.** Changes in lipid levels and carotid plaque height in the RORA-AS study

|                                   | <b>Baseline<br/>Mean±SD</b> | <b>18 months<br/>Mean±SD</b> | <b>Mean difference<br/>(95% CI)</b> | <b>p-value</b> |
|-----------------------------------|-----------------------------|------------------------------|-------------------------------------|----------------|
| <b>CP height (mm)</b>             | 1.93±0.53                   | 1.73±0.49                    | -0.20 (-0.28, -0.12)                | <0.001         |
| <b>c-IMT (mm)</b>                 | 0.72±0.15                   | 0.71±0.14                    | -0.01 (-0.03, 0.01)                 | 0.21           |
| <b>LDL-cholesterol (mmol/L)</b>   | 4.01±1.01                   | 1.71±0.42                    | -2.30 (-2.48, -2.11)                | <0.001         |
| <b>HDL-cholesterol (mmol/L)</b>   | 1.71±0.50                   | 1.78±0.51                    | 0.07 (0.00, 0.14)                   | 0.05           |
| <b>Triglycerides (mmol/L)</b>     | 1.45±0.83                   | 1.08±0.45                    | -0.37 (-0.51, -0.22)                | <0.001         |
| <b>Total cholesterol (mmol/L)</b> | 6.35±1.11                   | 3.97±0.64                    | -2.38 (-2.59, -2.17)                | <0.001         |

SD: Standard deviation of the mean, CI: Confidence interval, CP: Carotid plaque, c-IMT: carotid intima-media thickness, LDL: Low-density lipoprotein, HDL: High-density lipoprotein.
